# Supplementary material
Source: PubMed Central journal article supplement (PMC2690612)

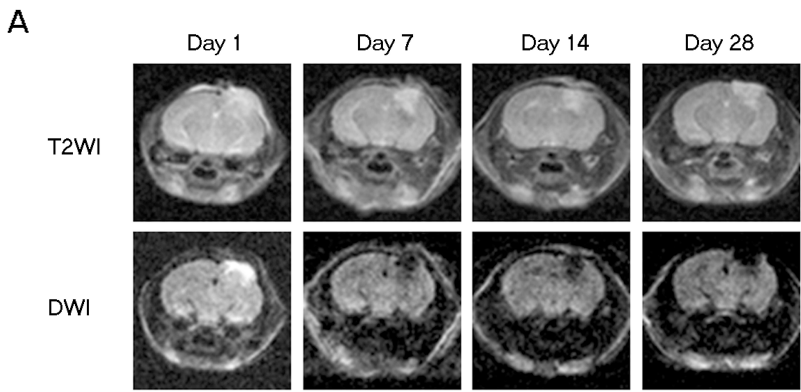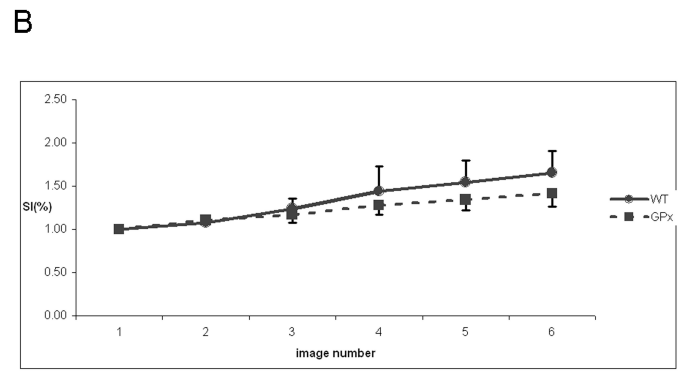

Supplement: NIHMS89107-supplement-sup__fig_2.pdf [file NIHMS89107-supplement-sup__fig_2.pdf]

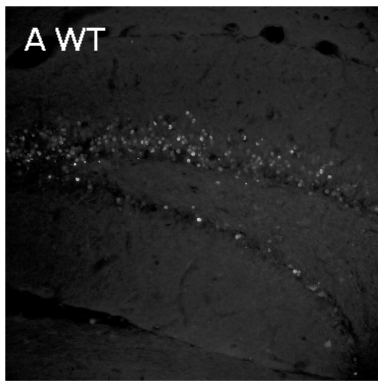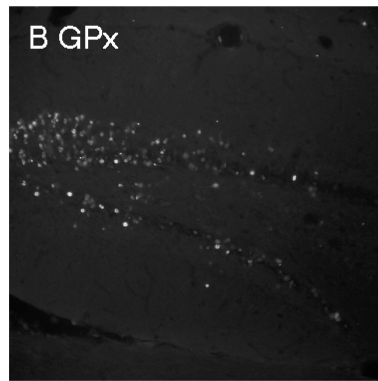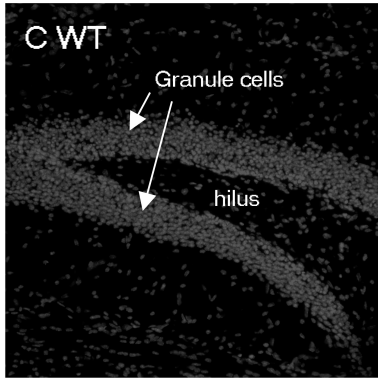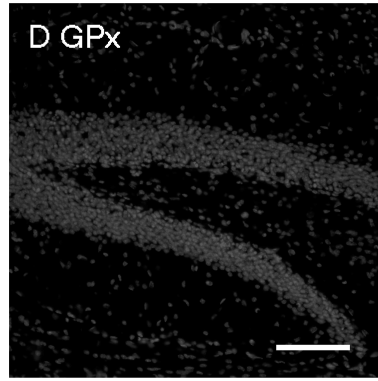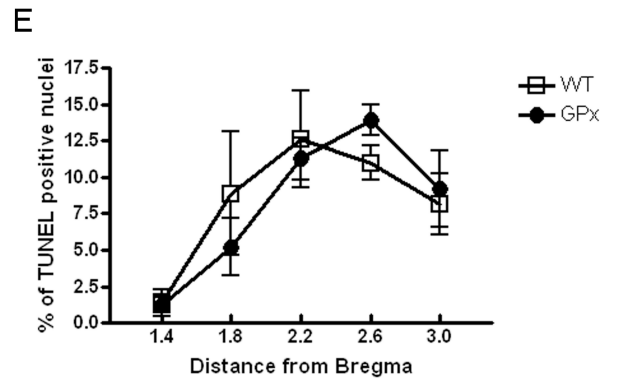

Supplement: NIHMS89107-supplement-sup__fig__1.pdf [file NIHMS89107-supplement-sup__fig__1.pdf]

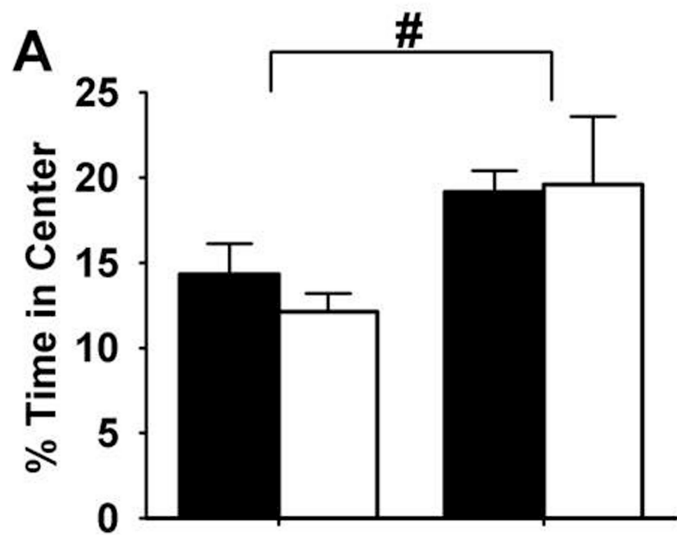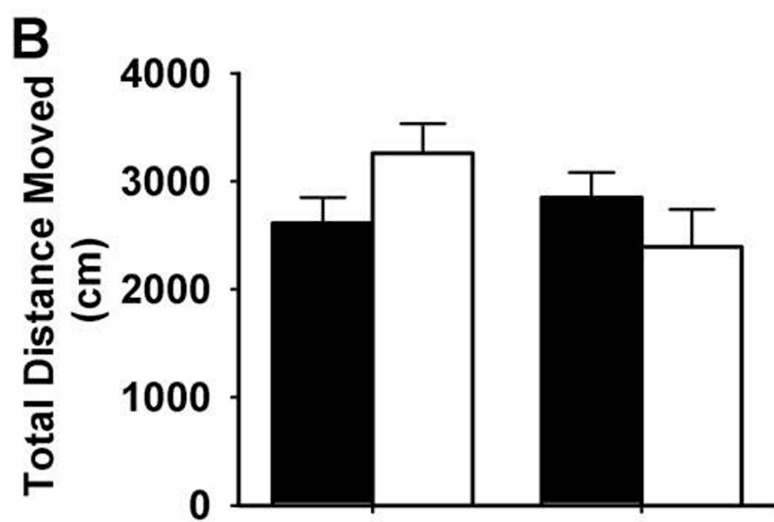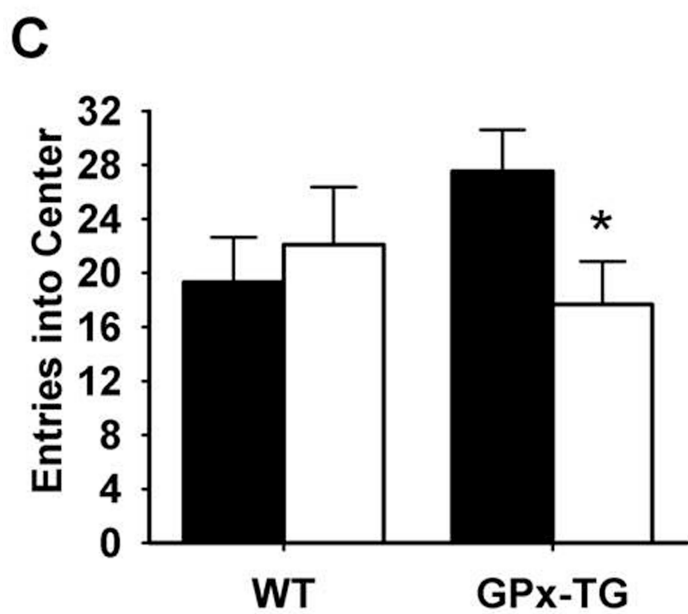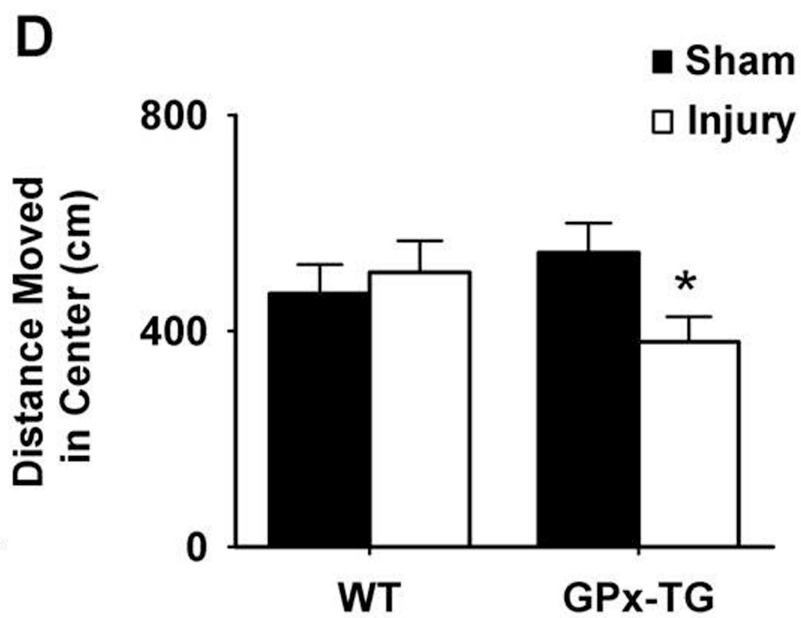

Supplement: NIHMS89107-supplement-sup__fig__3.pdf [file NIHMS89107-supplement-sup__fig__3.pdf]

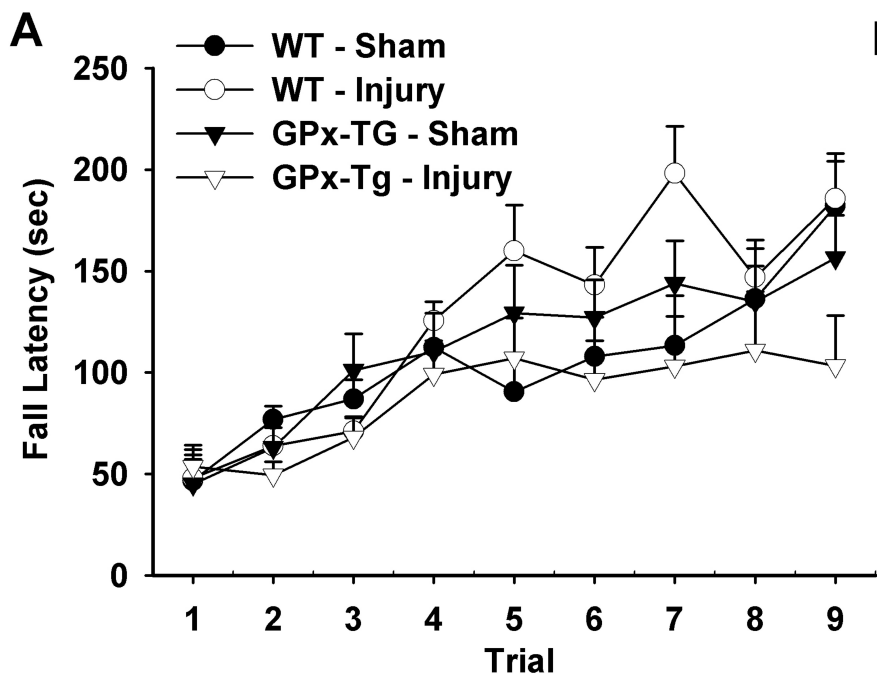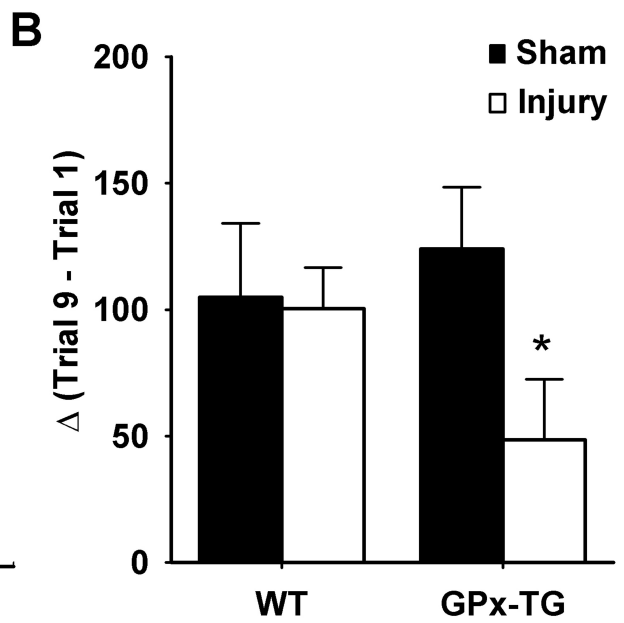

Supplement: NIHMS89107-supplement-sup__fig__4.pdf [file NIHMS89107-supplement-sup__fig__4.pdf]

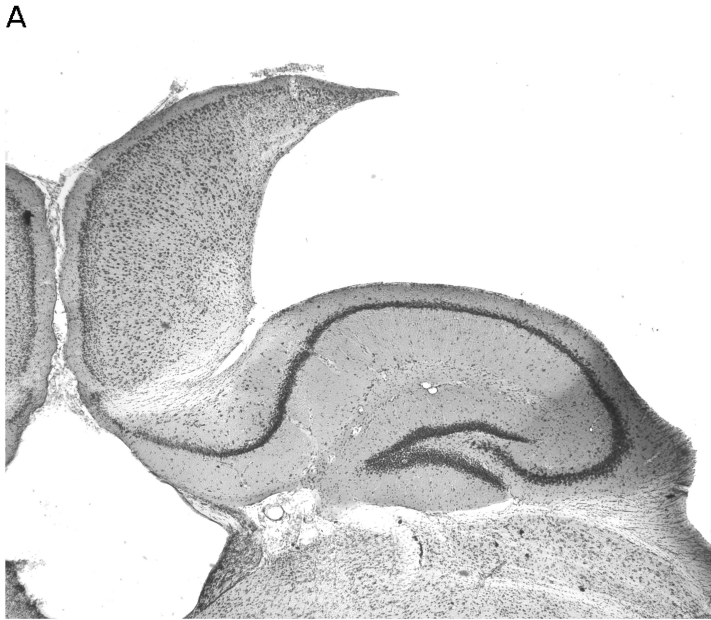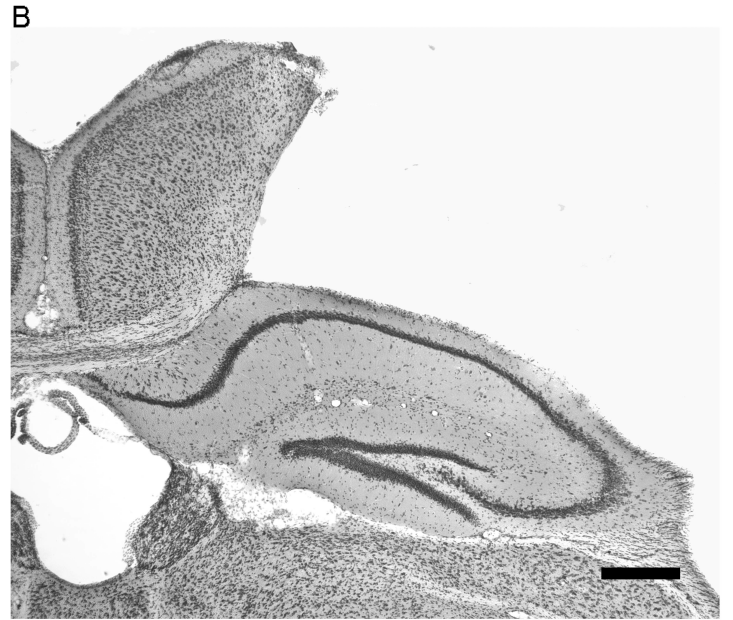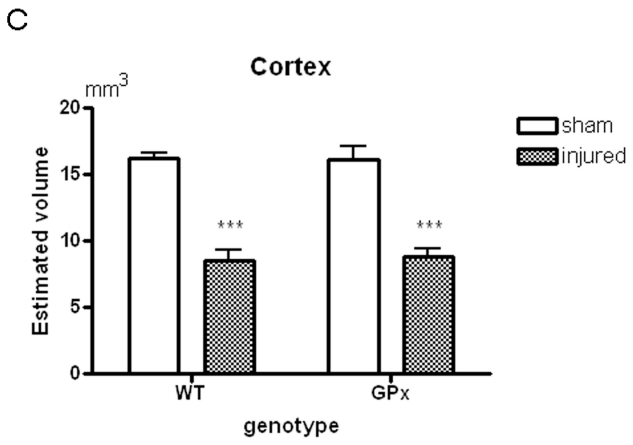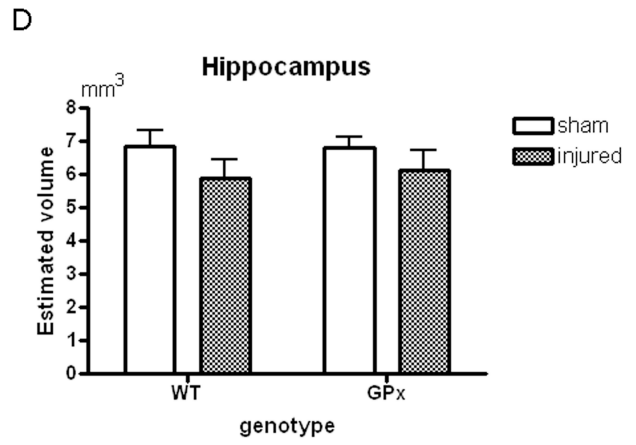

Supplement: NIHMS89107-supplement-sup__fig__5.pdf [file NIHMS89107-supplement-sup__fig__5.pdf]
